# Supplementary material
Source: MDPI journal article supplement (https://www.mdpi.com/2411-5142/6/2/35)
Supplement: s1 [file s1]

## Supplemental Material

Shapiro-Wilk test:

```
shapiro.test()
```

Breusch-Pagan test:

```
library(lmtest)
```

```
bptest()
```

Paired-sample t-test:

```
t.test()
```

Cohen d effect size:

```
library(effsize)
```

```
cohen.d()
```

Pearson product-moment correlation:

```
cor.test()
```

Standard deviation with 95% confidence limits:

```
library(Ecfun)
```

```
sd()
```

```
confint.sd()
```

Bland-Altman analysis:

```
library(blandr)
```

```
blandr.statistics()
```

Deming regression:

```
library(mcr)
```

```
mcreg()
```
